# Supplementary material for: Functional Analysis of 3′UTR Variants at the LDLR and PCSK9 Genes in Patients with Familial Hypercholesterolemia
Source: Hindawi journal article supplement (doi:10.1155/2024/9964734), 2024-02-08
Supplement: f6 [file 9964734.f6.pdf]

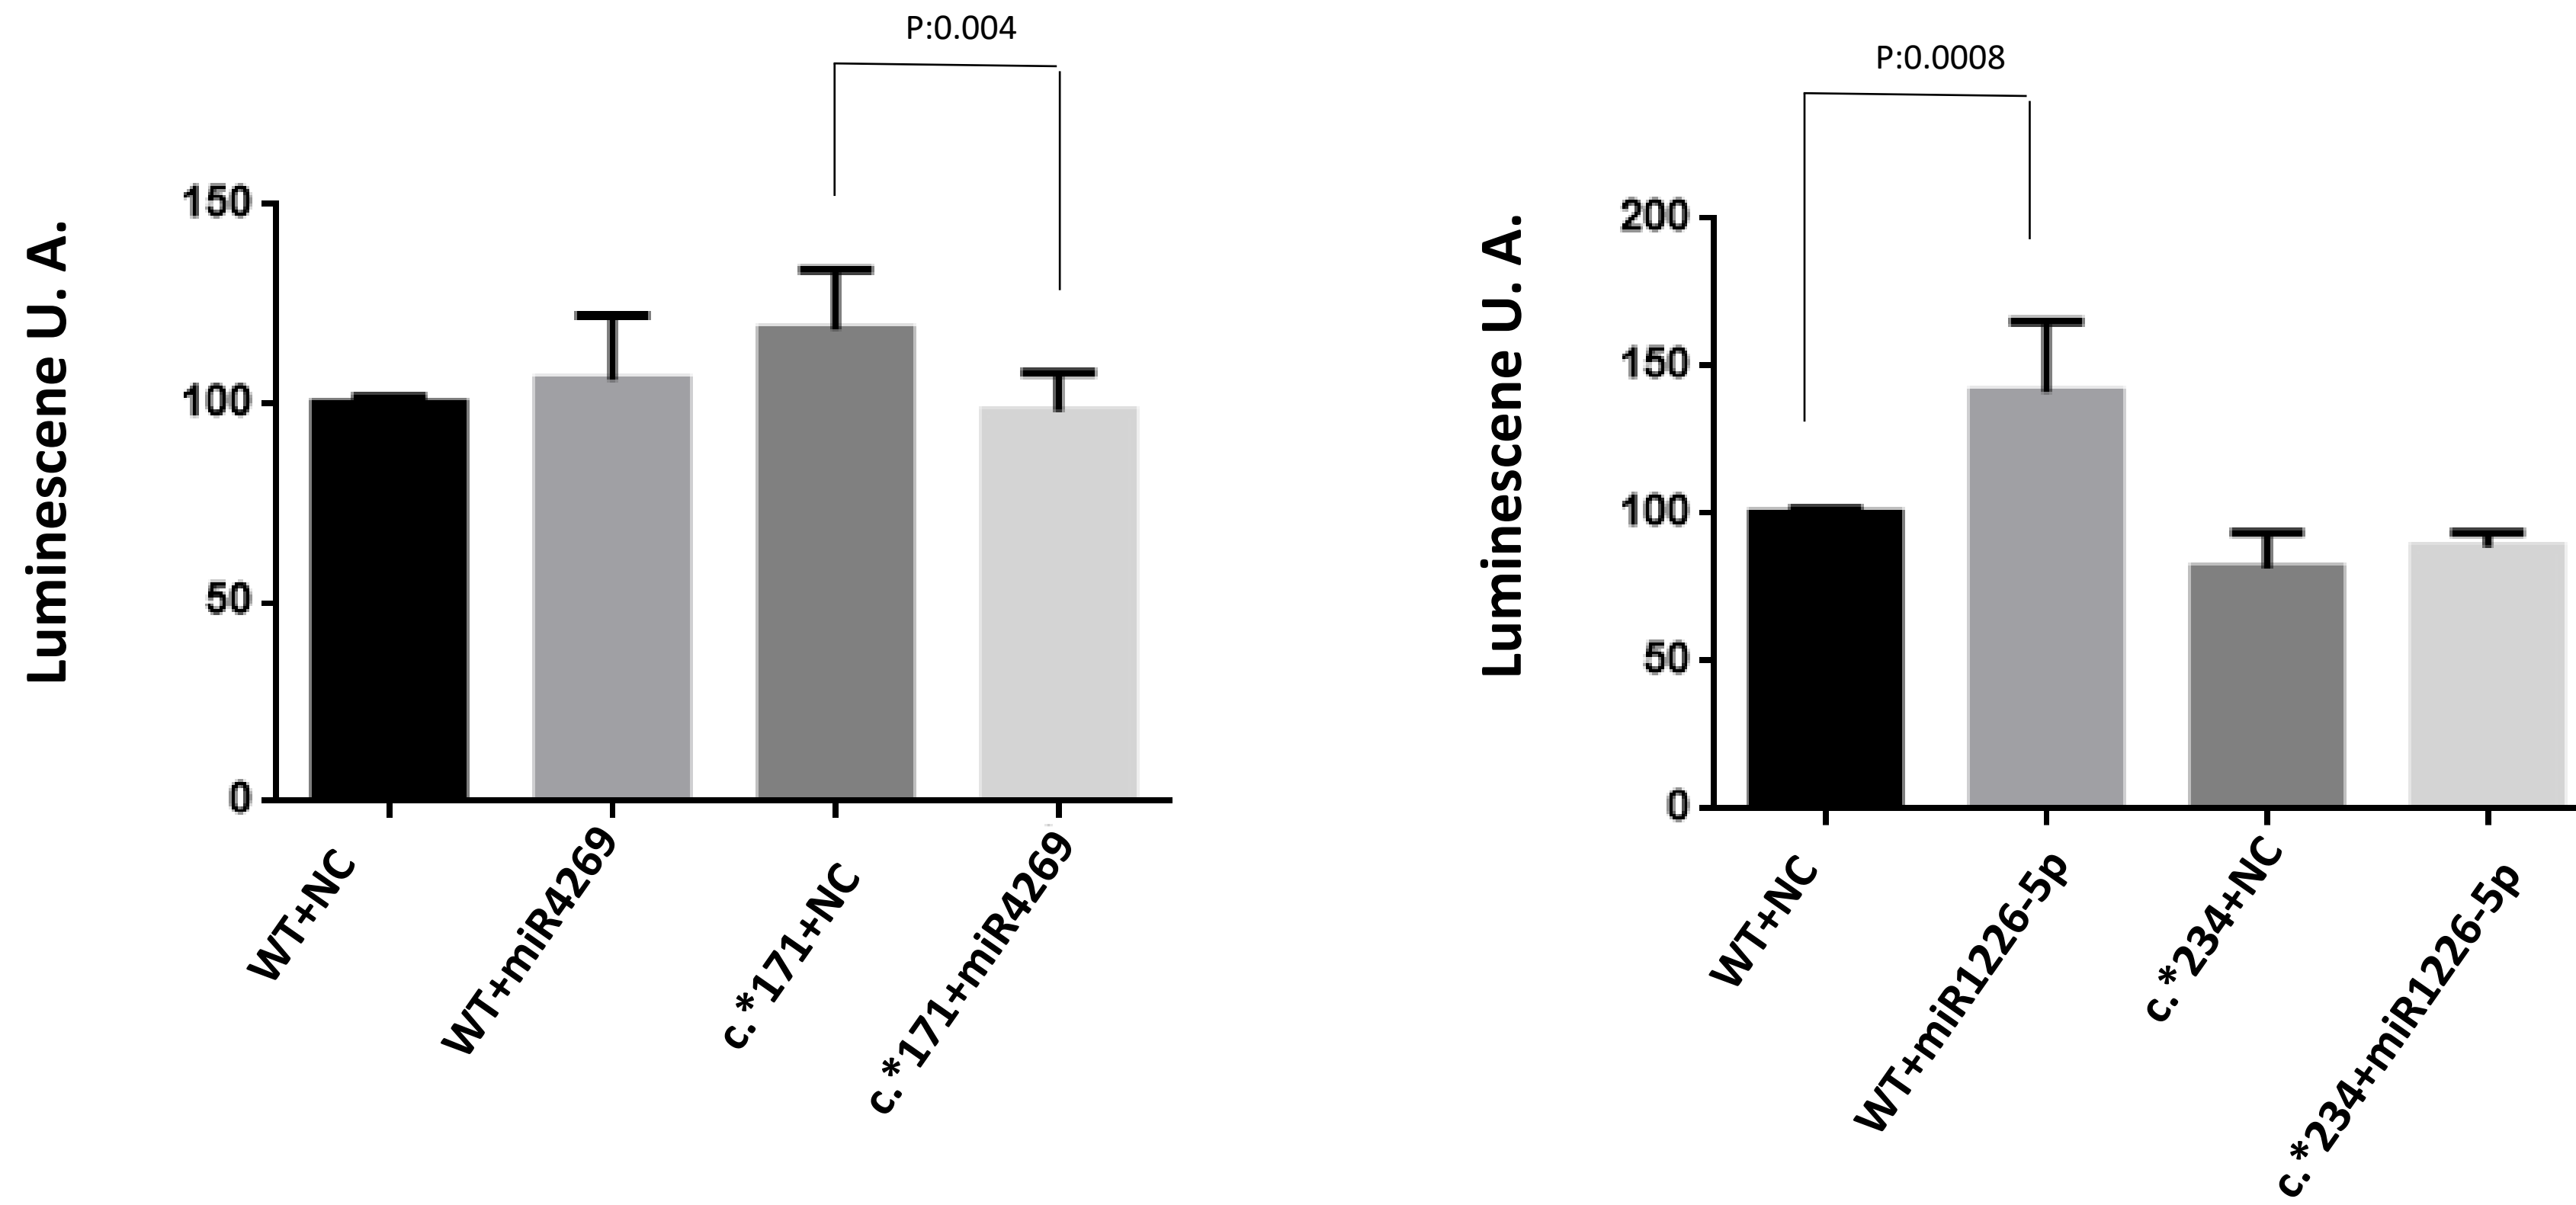

| Groups                                             | Luciferase activity (%)      | Difference between groups | 95% confidence interval | P value |
|----------------------------------------------------|------------------------------|---------------------------|-------------------------|---------|
| PCSK9 3'UTR WT+NC vs<br>PCSK9 3'UTR WT+miR-4269    | 100.2 ± 0.54<br>105.9 ± 5.47 | 5.70 ± 5.50               | -186.97 to .33          | 0.3298  |
| c.*171C>T+NC vs<br>c.*171C>T+miR-4269              | 118.7 ± 4.99<br>98.20 ± 3.23 | -20.51 ± 5.95             | -33.29 to -7.73         | 0.004   |
| PCSK9 3'UTR WT+NC vs<br>PCSK9 3'UTR WT+miR-1226-5p | 100.2 ± 0.54<br>141,5 ± 7,92 | 41,25 ± 7,94              | 22,98 to 59,52          | 0,0008  |
| c.*234C>T+NC vs<br>c.*234C>T+miR-1226-5p           | 81,50 ± 4,11<br>88,76 ± 1,72 | 7,26 ± 4,46               | -2,58 to 17,09          | 0,1324  |

\*WT: wild type; NC negative control; miR-1226: miR1226-5p

**Figure SF1.** a) Effect of miR-4269 on the expression of the 3'UTR-PCSK9 variant c.\*171C>T and b) effect of miR-1226 on the expression of the 3'UTR-PCSK9 variant: c.\*234C>T in the luciferase reporter assay.
