# Supplementary material for: Functional Analysis of 3′UTR Variants at the LDLR and PCSK9 Genes in Patients with Familial Hypercholesterolemia
Source: Hindawi journal article supplement (doi:10.1155/2024/9964734), 2024-02-08
Supplement: f7 [file 9964734.f7.pdf]

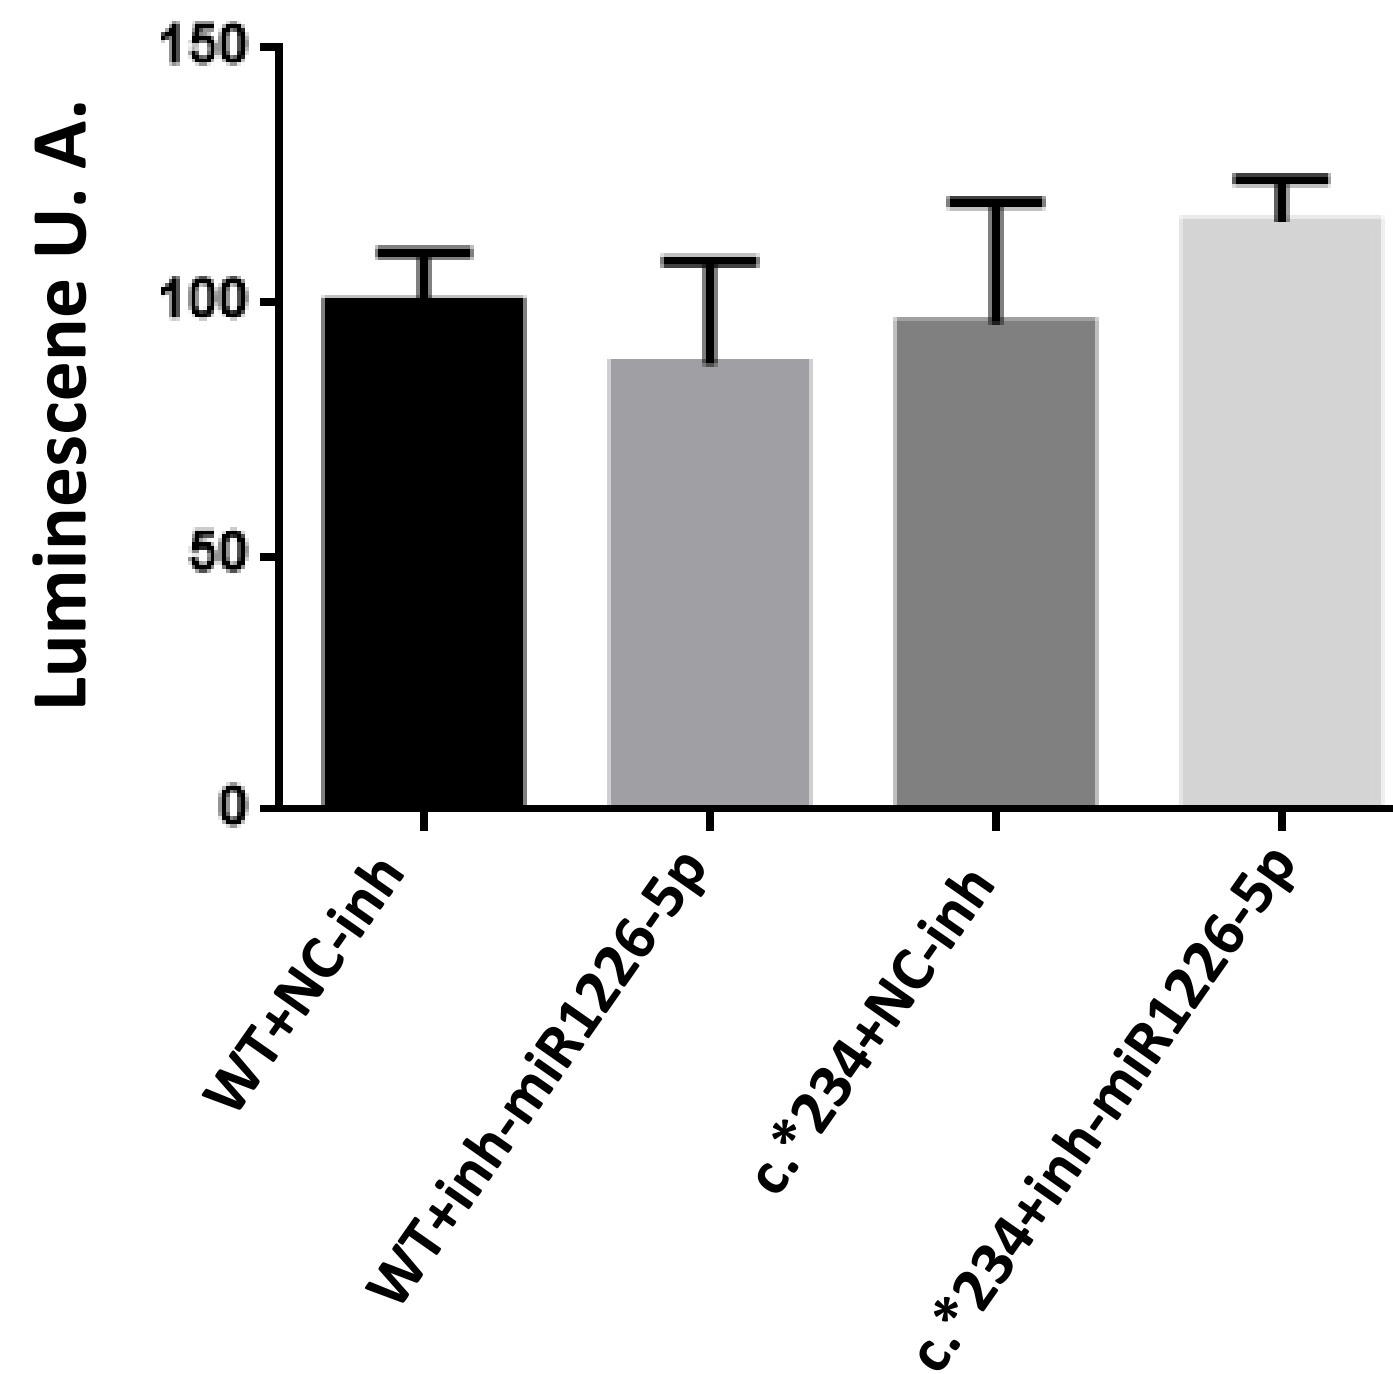

| Groups                                                  | Luciferase activity (%)      | Difference between groups | 95% confidence interval | P value |
|---------------------------------------------------------|------------------------------|---------------------------|-------------------------|---------|
| PCSK9 3'UTR WT+NC-inh vs<br>3'UTR-PCSK9 WT+inh-miR-1226 | 99,99 ± 3,14<br>87,76 ± 7,28 | -12,23 ± 7,93             | -30,00 to 5,54          | 0,1554  |
| c.*234C>T+NC-inh vs<br>c.*234>T+inh-miR-1226            | 95,89 ± 8,47<br>116,0 ± 2,66 | 20,07 ± 8,88              | -0,23 to 40,38          | 0,0521  |

\*WT: wild type; NC-inh negative control inhibitor; inh inhibitor miR-1226: miR1226-5p

**Figure SF2.** Effect of miR-1226 inhibitor on the expression of the 3'UTR-PCSK9 variant c.\*234C>T versus 3'UTR-PCSK9 WT in the luciferase reporter assay
